1 **Full title:** Protein lactylation induced by neural excitation

2 **Short title:** Protein lactylation in the brain

3 **Authors:** Hideo Hagihara<sup>1</sup>, Hirotaka Shoji<sup>1</sup>, Hikari Otabi<sup>2,3</sup>, Atsushi Toyoda<sup>2,3,4</sup>, Kaoru Katoh<sup>5</sup>,  
4 Masakazu Namihira<sup>5</sup>, Tsuyoshi Miyakawa<sup>1\*</sup>

5 **Affiliations:**

6 <sup>1</sup> Division of Systems Medical Science, Institute for Comprehensive Medical Science,  
7 Fujita Health University, Aichi, Japan

8 <sup>2</sup> College of Agriculture, Ibaraki University, Ibaraki, Japan

9 <sup>3</sup> United Graduate School of Agricultural Science, Tokyo University of Agriculture and  
10 Technology, Tokyo, Japan

11 <sup>4</sup> Ibaraki University Cooperation between Agriculture and Medical Science (IUCAM),  
12 Ibaraki, Japan

13 <sup>5</sup> Biomedical Research Institute, National Institute of Advanced Industrial Science and  
14 Technology (AIST), Ibaraki, Japan

15           \*Corresponding Author: Tsuyoshi Miyakawa (miyakawa@fujita-hu.ac.jp)

16   **Keywords:** lactylation, lactate, brain, posttranslational modification, histone H1

17

18   ORCID ID

19   Hideo Hagihara: <https://orcid.org/0000-0001-9602-9518>

20   Hiroataka Shoji: <https://orcid.org/0000-0003-4843-6949>

21   Hikari Otabi: <https://orcid.org/0000-0001-5127-8190>

22   Atsushi Toyoda: <https://orcid.org/0000-0002-0245-3244>

23   Kaoru Katoh:   <https://orcid.org/0000-0001-6590-413X>

24   Masakazu Namihira: <https://orcid.org/0000-0003-2108-5712>

25   Tsuyoshi Miyakawa: <https://orcid.org/0000-0003-0137-8200>

26 **Abstract**

27 Lactate is known to have diverse roles in the brain at the molecular and behavioral levels  
28 under both physiological and pathophysiological conditions, such as learning and memory  
29 and regulation of mood. Recently, a novel post-translational modification called lysine  
30 lactylation has been found in histone H3 of mouse macrophages, and the lactylation levels  
31 paralleled the intracellular lactate levels<sup>1</sup>. However, it is unknown whether lysine lactylation  
32 occurs in brain cells, and if it does, whether lactylation is induced by the stimuli that  
33 accompany changes in lactate levels. Herein, we reveal that lysine lactylation in brain cells  
34 is regulated by systemic changes in lactate levels, neural excitation, and behaviorally  
35 relevant stimuli. Lysine lactylation levels were increased by lactate treatment and by high-  
36 potassium-induced depolarization in cultured primary neurons; these increases were  
37 attenuated by pharmacological inhibition of monocarboxylate transporter 2 and lactate  
38 dehydrogenase, respectively, suggesting that both cell-autonomous and non-cell-  
39 autonomous neuronal mechanisms are involved in overall lysine lactylation. *In vivo*,  
40 electroconvulsive stimulation increased lysine lactylation levels in the prefrontal cortices of  
41 mice, and its levels were positively correlated with the expression levels of the neuronal  
42 activity marker c-Fos on an individual cell basis. In the social defeat stress model of  
43 depression in which brain lactate levels increase, lactylation levels were increased in the  
44 prefrontal cortices of the defeated mice, which was accompanied by increased c-Fos  
45 expression, decreased social behaviors, and increased anxiety-like behaviors, suggesting

46 that stress-induced neuronal excitation may induce lysine lactylation, thereby affecting  
47 mood-related behaviors. Further, we identified 63 candidate lysine-lactylated proteins in  
48 the mouse cortex and found that lactylation levels in histone H1 increased in response to  
49 defeat stress. This study may open up an avenue for exploration of a novel role of neuronal  
50 activity-induced lactate mediated by protein lactylation in the brain.

51 **Main text**

52 Lactate in the brain has emerged as an energy substrate and a valuable signaling molecule<sup>2</sup>,  
53 and its alteration has been implicated in multiple neuropsychiatric disorders. Among  
54 various strains/conditions of animal models of neuropsychiatric disorders, we have  
55 identified more than 20 out of 65 strains/conditions of mice that show altered lactate levels  
56 in whole brain<sup>3,4</sup>. A recent research identified lysine lactylation (Kla) as a novel post-  
57 translational modification in histone protein that can be stimulated by lactate<sup>1</sup>. A report by  
58 Zhang et al. suggested that histone H3 Kla mediates a metabolic alteration-related lactate  
59 regulation of gene expression in mouse bone marrow-derived macrophages<sup>1</sup>. The following  
60 reports have described key roles of lactate-induced Kla in macrophages in the transition of  
61 macrophages from a proinflammatory state to a reparative state<sup>5</sup> and the pathogenesis of  
62 lung fibrosis<sup>6</sup>. However, it has not been elucidated whether this Kla occurs and is regulated  
63 by exogenous lactate treatment or by stimulation that increases endogenous lactate levels  
64 in other types of cells/tissues including brain cells.

65

66 **Lactate treatment and neuronal excitation increase protein lactylation in the brain**

67 Kla was detected by western blot analysis in mouse brain tissues, with patterns different  
68 from those observed in macrophages and peripheral organs (Fig. 1a, Extended Data Fig. 1).  
69 With confocal microscopic imaging, we observed Kla signals throughout the cell, including  
70 somata and neurites, with a relatively weak signal in the nucleus region in primary cultured  
71 neurons expressing the neuronal marker  $\beta$ III-tubulin (Fig. 1b). These results suggest that Kla  
72 modifications occur in various proteins to varying degrees, potentially with neural cell-  
73 specific functional roles different from those found in macrophages.

74 We investigated whether extracellular application of lactate stimulates Kla in  
75 neuronal cells as seen in macrophages<sup>1</sup>. Lactate treatment significantly increased Kla  
76 immunoreactivity in the primary cultured neurons (Fig. 1c, d), as confirmed by an  
77 independent experiment performed at a different institute (Extended Data Fig. 2). The  
78 increase in Kla immunoreactivity was attenuated in a dose-dependent manner by  $\alpha$ -cyano-  
79 4-hydroxycinnamate (4-CIN), a monocarboxylate transporter 2 (MCT2) inhibitor that blocks  
80 lactate transport into neurons (Fig. 1d). Considering that there are few astrocyte-like cells

81 in the culture (Fig. 1e), lactate derived from astrocytes may minimally affect the lactate  
82 contents therein. Furthermore, in an *in vivo* experiment, we found that chronic and  
83 systemic treatment with lactate, shown to increase extracellular lactate concentrations in  
84 the brain<sup>7</sup>, increased K1a immunoreactivity in the mouse prefrontal cortex (PFC) (Fig. 1f–h),  
85 but not in the hippocampus (Extended Data Fig. 3), suggesting that exogenous lactate  
86 stimulates protein lactylation in the brain in a region-dependent manner.

87 To examine in what neural cell types protein lactylation occurs in the brain, we  
88 conducted double-immunostaining of K1a with cell type-specific markers on mouse PFC:  
89 Camk2a for glutamatergic neurons, GAD67 for GABAergic neurons, S100b for astrocytes,  
90 and CD68 for microglia. K1a immunoreactivity was found in all cell types examined,  
91 suggesting that protein lactylation may ubiquitously occur in neural cells in the brain (Fig.  
92 1i).

93

94 **Neuronal excitation stimulates protein lactylation in the brain**

95 Neuronal excitation increases brain lactate levels<sup>8–12</sup>. We examined lactate and protein  
96 lactylation levels using an *in vitro* neuronal excitation model. Primary neuron cultures were  
97 treated with a high concentration of potassium ions (high-K) (Fig. 2a) to induce  
98 depolarization of neurons *in vitro*. The high-K treatment resulted in increased lactate  
99 concentration in the culture supernatant at 30 minutes after the initiation of treatment (Fig.  
100 2b). The intracellular lactate level showed a trend of time-dependent increase and reached  
101 significant increase at 2 hours after the initiation of high-K treatment (Fig. 2b). The high-K-  
102 induced increase in K<sub>1a</sub> levels was attenuated by treatment with sodium oxamate (OX),  
103 which inhibits lactate dehydrogenase (LDH) activity in neural<sup>13,14</sup> and other cell types<sup>1</sup> (Fig.  
104 2c), suggesting that neuronal excitation may induce protein lactylation via intracellular  
105 metabolism and the glycolytic pathway. To test this hypothesis *in vivo*, we treated mice with  
106 electroconvulsive stimulation (ECS) and then examined lactate and protein lactylation levels  
107 in the brain. The brain lactate levels increased 10 minutes after ECS and persisted for 1 hour  
108 (Fig. 2d, e). We then examined K<sub>1a</sub> levels in mouse brains treated with ECS in combination  
109 with OX and/or 4-CIN (Fig. 2f). While the ECS-induced increase in K<sub>1a</sub> immunoreactivity was



110 not significantly affected by prior treatment with either OX or 4-CIN alone, it was attenuated  
111 by a combination treatment with OX and 4-CIN (Fig. 2g, h), suggesting that, *in vivo*, both  
112 intracellular new lactate production and extracellular lactate uptake have a role in neuronal  
113 activation-induced protein lactylation in the acute phase.

114 c-Fos is an immediate early gene product used as a marker for neuronal  
115 activation<sup>15</sup>. Utilizing the characteristics of c-Fos expression, we investigated the relation  
116 between Kla and c-Fos expressions in the ECS mouse model. Upon double-immunostaining  
117 analysis of c-Fos-expressing cells in the PFC, we found a significant positive correlation  
118 between Kla and c-Fos immunoreactive intensities on an individual cell basis level (Fig. 2i, j,  
119 Extended Data Fig. 4). Considering that intensity of electrical stimulation positively  
120 correlates with c-Fos-labeling levels in individual neurons<sup>16</sup>, our results suggest that the  
121 more neurons are activated, the more Kla is induced in the cells. However, we have to note  
122 that there also are many cells that are Kla-positive but c-Fos-negative, suggesting that some  
123 Kla formations are independent of neuronal activation or lasts longer than that of c-Fos  
124 protein expression after neuronal activation.

125

126 **Social stress stimulates protein lactylation in the brain**

127 We explored whether protein lactylation in the brain is modified by a physiologically  
128 relevant stimulus using a social defeat stress (SDS) model of depression. SDS has been  
129 shown to increase c-Fos expression levels in many brain regions<sup>17–19</sup>. Brain lactate levels  
130 increased immediately (10 minutes) after a single exposure to the stress, and the increase  
131 was attenuated by prior treatment with OX<sup>1</sup> (Extended Data Fig. 5).

132 Further, we conducted a chronic experiment where the mice experienced daily  
133 defeat stress with prior treatment with OX or vehicle (saline) for 10 consecutive days. To  
134 examine the correlation between brain lactate and K1a levels and behavioral measures of  
135 anxiety and depression, we conducted a series of behavioral tests prior to brain sampling  
136 (Fig. 3a, Extended Data Fig. 6, 7). In the social avoidance test, the social interaction ratio  
137 decreased in both chronic vehicle-treated and OX-treated socially defeated mice compared  
138 to control mice (Fig. 3b). Based on the standard criteria<sup>20,21</sup>, we focused on mice susceptible

139 to SDS, which showed a social interaction ratio  $<1$  in the social avoidance test and  
140 designated them as defeated mice for the following behavioral and brain tissue analyses.

141 We found that brain lactate levels were higher in defeated mice than in control  
142 mice (Fig. 3c), as confirmed by independent sets of mice (Extended Data Fig. 8). Brain lactate  
143 levels were paradoxically increased in OX-treated defeated mice at 9 days after the last  
144 stress exposure and OX treatment compared to vehicle-treated defeated mice and control  
145 mice (Fig. 3c). Simple correlation (Fig. 3d; Extended Data Fig. 9) and multiple regression  
146 (Extended Data Table 1) analyses suggested that increased brain lactate levels are  
147 preferentially associated with increased anxiety-like behaviors. In this stress model, Kla  
148 levels in the PFC were increased in vehicle-treated defeated mice and, to a larger extent, in  
149 OX-treated defeated mice compared to control mice (Fig. 3e, f).

150 Expression of neuronal activity marker c-Fos in the PFC also increased in vehicle-  
151 treated defeated mice and, to a larger extent, in OX-treated defeated mice, in both a familiar  
152 environment in the home cage (non-stimulated basal condition) and novel environment  
153 exposed to the open field (condition with anxiogenic stimulation) (Fig. 3g, h). In the mice

154 that received anxiogenic stimulation to ensure more c-Fos-expressing cells, we found that  
155 the Kla level positively correlated with the c-Fos expression level in the PFC (Fig. 3i).  
156 Although changes in Kla and c-Fos expression levels were observed in some other brain  
157 regions implicated in anxiety and depression behaviors (e.g., hippocampus, lateral habenula,  
158 and amygdala; Extended Data Fig. 10, 11), no significant correlations were found between  
159 Kla and c-Fos expression levels in brain regions other than the PFC (Extended Data Fig. 12),  
160 suggesting that simultaneous induction of c-Fos and Kla occurs in a brain region-specific  
161 manner following repeated SDS. Furthermore, we found that Kla levels in the PFC, but not  
162 in the amygdala and hippocampal subregions, negatively correlated with the social  
163 interaction ratio in the social avoidance test (Fig. 3j, Extended Data Fig. 13) and with  
164 distance traveled in the dark compartment in the light–dark transition test (Fig. 3k),  
165 indicating that the more susceptible to SDS and the more anxious the mouse is, the higher  
166 the Kla levels in the PFC.

167

168 **Identification of lactylated proteins in the brain**

169 We sought to identify and quantify the brain proteins modified by lactylation and whose  
170 lactylation levels changed in response to SDS. Accordingly, we analyzed the PFC of defeated  
171 and control mice using Kla antibody immunoprecipitation and mass spectrometry  
172 techniques. This analysis identified 63 candidate lysine-lactylated proteins in the mouse PFC  
173 (Extended Data Table 2). GO-enrichment analysis with DAVID<sup>22,23</sup> showed that these  
174 proteins were mainly enriched in nucleosome- and histone-related biological processes  
175 (Extended Data Table 3). Among them, 12 proteins were suggested to be changed by SDS,  
176 of which seven were upregulated and five were downregulated. Notably, four subtypes of  
177 histone H1 were included in the 12 changed proteins and all were upregulated, suggesting  
178 that SDS increases lactylation at histone H1. We confirmed these observations by  
179 conducting immunoprecipitation with the histone H1 antibody followed by western blot  
180 analysis with the Kla antibody (Extended Data Fig. 14). In the PFC, 59.5% of cells were  
181 positive for histone H1 and nearly all the histone H1-positive cells (94.6%) were Kla positive,  
182 and vice versa (99.1% of Kla-positive cells were histone H1 positive) (Fig. 4a, b). Upon super-  
183 resolution imaging using stimulated emission depletion (STED) microscopy, we observed

184 histone H1 and Kla double-positive structures in the nucleus, suggestive of lysine lactylation  
185 at histone H1 (Fig. 4c). Importantly, the double-positive structures in the nucleus increased  
186 in the defeated mice compared to control mice (Fig. 4d), further supporting that SDS  
187 enhances lysine lactylation levels at histone H1 in the PFC.

188

## 189 **Discussion**

190 In this study, we showed that a novel post-translational modification called lysine  
191 lactylation occurs in brain cells and that its levels can be changed by neuronal excitation.  
192 We found that increasing lactate levels by lactate addition or inducing neuronal excitation  
193 with high-K or ECS increased Kla levels in the mouse brain cells both *in vitro* and *in vivo*. The  
194 lactate and Kla levels also increased by behaviorally induced neuronal excitation associated  
195 with SDS. In the SDS model of depression, Kla levels in the PFC, a core brain region  
196 implicated in depressive and anxiety disorders, correlated with anxiety-like behaviors,  
197 suggesting a potential behavioral significance of Kla in the brain. Furthermore, our

198 proteomic approach identified 63 candidate lactylated proteins in the mouse PFC and  
199 highlighted that histone H1 lactylation increases in response to chronic stress.

200           Our results using SDS model mice suggest that, in stress-related pathological  
201 conditions, excess neuronal activity may underlie increased protein lactylation in the PFC,  
202 potentially associated with susceptibility to stress and anxiety-like behavior, although the  
203 causal mechanism remained unclear. Given that increased Kla levels reflect neuronal  
204 activity, it might be expected that significant correlations can be seen between Kla levels in  
205 the brain regions other than PFC and behavioral alterations. Adaptation in neuronal activity  
206 has been suggested to occur following repeated SDS in some brain regions; for example,  
207 neurons in the central nucleus of amygdala became less active and showed suppressed c-  
208 Fos expression after repeated SDS<sup>24</sup>. Such adaptation in neuronal activity may affect c-Fos  
209 expression, possibly as well as Kla induction, resulting in no clear correlations between  
210 behavior and Kla levels in brain regions other than the PFC.

211           Regarding the mechanisms of Kla formation, Zhang et al. showed that, using a <sup>13</sup>C-  
212 labeled L-lactate incorporation method, Kla could be derived directly from lactate

213 exogenously applied to mouse bone marrow-derived macrophages<sup>1</sup>. Conversely, other  
214 studies have suggested that K<sub>la</sub> formation could be mediated indirectly by a glycolytic  
215 intermediate, lactoylglutathione, which can provide a lactyl group to lysine residues. L-  
216 Lactate is suggested to suppress the activity of glyoxalase 2, an enzyme catalyzing the  
217 conversion of lactoylglutathione into glutathione and free D-lactate. Such suppression due  
218 to increased L-lactate could elevate lactoylglutathione levels, which in turn, may facilitate  
219 the indirect lactylation pathway. Gaffney et al. used a stable isotope labeling of amino acids  
220 in cell culture (SILAC) model to identify lactylated proteins that could be formed via  
221 lactoylglutathione in the HEK293 cell line<sup>25</sup>. The identified proteins were enriched in  
222 glycolytic and carbon-metabolism enzymes but did not include histone family proteins. As  
223 mentioned above, K<sub>la</sub> forms directly from lactate on histone H3<sup>1</sup>. Our list includes histone  
224 H3 as well as the 60S ribosomal protein L30 and Rho guanine nucleotide exchange factor 2,  
225 also found in the 350-protein list published by Gaffney et al.<sup>25</sup> These observations suggest  
226 that direct and indirect lactylation pathways may coexist, rather than being exclusive,



227 depending on the proteins expressed in the brain. Regardless of the mechanisms, lysine  
228 lactylation may play a role in coupling metabolic changes to gene-expression regulation.

229           Our analyses highlighted that H1 histones increase their K1a levels in response to  
230 SDS. Histone H1 is known to be a linker histone, having a key role in higher-order chromatin  
231 folding and genome stability. Seven subtypes of H1 histone have been identified in  
232 mammalian somatic cells, i.e., H1.0–1.5 and H1.10<sup>26</sup>. Numerous post-translational  
233 modifications have been identified in H1, such as phosphorylation, methylation, acetylation,  
234 formylation, crotonylation, and citrullination<sup>27</sup>. Post-translational modifications of histone  
235 H1 have received less attention than those of core histones; therefore, knowledge on the  
236 functional role of H1 modifications is limited<sup>26,28</sup>, especially in brain cells. In the case of  
237 mouse macrophage histone H3, lactylation competes with acetylation at lysine residues to  
238 regulate the expression of a specific gene set. Extrapolating these findings to histone H1  
239 and considering that histone H1 acetylation regulates chromatin compaction and  
240 decondensation and hence the accessibility of linker DNA regions to transcription factors,

241 histone H1 lactylation may also be involved in gene-expression regulation depending on the  
242 balance of K<sub>la</sub> with acetylation.

243           In conclusion, this study indicates that a novel post-translational modification  
244 called lysine lactylation occurs in the brain, and it is regulated by neuronal activity. While  
245 63 candidate lactylated proteins were identified in the brain, it remains unclear whether  
246 such a modification has functional significance for each protein at the cellular and behavior  
247 levels, and if it does, in what brain regions and in what cell types and in what types of  
248 behavioral phenotypes. It would also be interesting to explore whether protein lactylation  
249 in the brain is related to the etiology and pathophysiology of neuropsychiatric disorders, as  
250 are altered lactate levels in the brains of animals<sup>3</sup>. Further studies may reveal unknown  
251 roles of lactate, linking neural activity, glycolytic metabolism, and molecular signaling  
252 mediated by protein lactylation under physiological and pathophysiological conditions.

253

254 **Methods**

255 **Animals**

256 C57BL/6J mice (7–9 weeks old) were purchased from Charles River Laboratories Japan, Inc.

257 (Hino, Japan) and Japan SLC (Shizuoka, Japan). Retired ICR mice were purchased from Chubu

258 Kagaku Shizai Co. Ltd. (Nagoya, Japan) and Japan SLC. The mice were habituated to their

259 environments for a week before experimentation. All animal experiments were approved

260 by the Institutional Animal Care and Use Committee of Fujita Health University, Ibaraki

261 University, and The National Institute of Advanced Industrial Science and Technology based

262 on the Law for the Humane Treatment and Management of Animals and the Standards

263 Relating to the Care and Management of Laboratory Animals and Relief of Pain. Every effort

264 was made to minimize the number of animals used.

265

266 **Cell culture**

267 Embryonic C57BL/6J mice (15.5–16.5 days old) were used for primary neuron culture. The  
268 frontal cortices and hippocampi were dissected from the brains in cold HEPES-buffered,  
269 calcium and magnesium-free Hank's balanced salt solution (HBSS; 14175-103, Thermo  
270 Fisher Scientific, Waltham, MA, USA) and dissociated in HBSS containing 0.25% papain  
271 (LS003127, Worthington Biochemical Corporation, Lakewood, NJ, USA), 0.1% L-cysteine  
272 (C7352, Merck, Darmstadt, Germany), 0.1% bovine serum albumin (BSA; A2153, Merck),  
273 and 0.01% DNase I (D4263, Merck) at 37°C for 12 minutes. The enzymatic digestion was  
274 stopped by adding a plating medium (Dulbecco's modified Eagle medium, D5796, Merck,  
275 containing 10% fetal bovine serum). Tissues were dissociated by pipetting, centrifuged at  
276 room temperature for 10 minutes, and resuspended in the plating medium. Cells were  
277 counted, seeded at a density of 25,000 cells/cm<sup>2</sup> on culture plates or glass coverslips  
278 previously coated with 0.01% poly-L-lysine (P8920, Merck), and incubated at 37°C. After 2  
279 hours, the plating medium was replaced by a culture medium (Neurobasal™ medium  
280 [21103-049, Thermo Fisher Scientific] containing B-27™ Supplement [17504-044, Thermo  
281 Fisher Scientific], 0.5 mM L-glutamine [G7513, Merck], and 1% penicillin-streptomycin

282 solution [P4333, Merck]). The culture medium was changed by one half with fresh medium  
283 every 3–4 days. At 10–14 days *in vitro*, drug treatment experiments, immunocytochemical  
284 analysis were conducted.

285

## 286 **Immunocytochemistry**

287 Cells were fixed with 4% paraformaldehyde (PFA) in phosphate-buffered saline (PBS) for 10  
288 minutes, pre-incubated for 30 minutes in 5% BSA (Merck) in PBS containing 0.05% Tween-  
289 20 (PBST), and then incubated for 30 minutes in PBS containing the primary antibodies:  
290 rabbit polyclonal anti-lactyllysine antibody (PTM-1401, PTM Biolabs, Hangzhou, China),  
291 mouse monoclonal anti-tubulin  $\beta$ 3 (801201, BioLegend, San Diego, CA, USA), and mouse  
292 monoclonal anti-glial fibrillary acidic protein antibody (G3893, Sigma-Aldrich, St Louis, MO,  
293 USA). Immunoreactivity to the antigen was visualized using Alexa Fluor 488- and Alexa Fluor  
294 594-conjugated secondary antibodies (Molecular Probes, Eugene, OR). Nuclear staining was  
295 performed with Hoechst 33258 (Polysciences, Warrington, PA). All reactions were  
296 performed at room temperature. We used a microscope (LSM 510 META; Zeiss, Göttingen,

297 Germany) to obtain images of the stained cells. The soma of tubulin  $\beta$ 3-positive cells was  
298 manually delineated and the signal intensity of Kla staining within the region of interest was  
299 recorded using ZEN software (Zeiss). At least 200 cells from triplicate wells per condition  
300 were analyzed.

301           The specificity of the Kla antibody was confirmed using dot blot analysis of lysine  
302 residues with various types of modifying groups (i.e., acetyl-, crotonyl-, propionyl-, butyryl-,  
303 trimethyl-, and succinyl-lysine); the antibody showed almost no cross-reactivity with these  
304 modified lysine residues<sup>1,29</sup>. Additionally, lactate treatment dramatically increased Kla  
305 immunoreactivity in human MCF-7, Hela, and MDA-MB-231 cell lines<sup>1,29</sup>.

306

### 307 **Immunohistochemistry**

308 Immunohistochemical analysis was performed as previously described with some  
309 modifications<sup>30,31</sup>. Briefly, mice were deeply anesthetized with isoflurane and transcardially  
310 perfused with PBS followed by 4% PFA in PBS. The brains were dissected, immersed  
311 overnight in the same fixative, and cryoprotected by sequential incubation in 10, 20, and

312 30% sucrose in PBS for 2–3 days each at 4°C. After cryoprotection, brains were mounted in  
313 Tissue-Tek optimal cutting temperature compound (Miles, Elkhart, IN), frozen, and cut into  
314 30- $\mu$ m-thick coronal sections using a microtome (CM1850; Leica Microsystems, Wetzlar,  
315 Germany). The sections were stored in PBS containing 0.1% sodium azide at 4°C until further  
316 use. The sections were pre-incubated for 1 hour at room temperature in 5% skim milk in  
317 PBST and then incubated overnight at 4°C in PBS containing the primary antibodies. We  
318 used rabbit polyclonal anti-lactyllysine antibody (PTM-1401, PTM Biolabs), mouse  
319 monoclonal anti-CaM Kinase II  $\alpha$  subunit antibody (05-532, Merck), mouse monoclonal anti-  
320 GAD67 antibody (MAB5406, Millipore), mouse monoclonal anti-S-100  $\beta$  subunit antibody  
321 (S2532, Merck), rat monoclonal anti-CD68 antibody (ab53444, abcam), and mouse  
322 monoclonal anti-c-Fos antibody (sc-166940, Santa Cruz Biotechnology, Santa Cruz, CA, USA).  
323 For c-Fos staining, antigen retrieval was performed by autoclave heating at 120°C for 1  
324 minute in 0.01 M sodium citrate buffer prior to the blocking step. Immunoreactivity to the  
325 antigen was visualized using Alexa Fluor 488- or Alexa Fluor 594-conjugated secondary  
326 antibody (Molecular Probes). Nuclear staining was performed with Hoechst 33258

327 (Polysciences). We used a microscope (LSM 510 META; Zeiss) to obtain images of the  
328 stained sections. Three to seven sections from each animal were processed for semi-  
329 quantification analyses in each brain region, and the averaged values were considered as  
330 one sample. c-Fos-positive cells were counted in the indicated brain regions, manually  
331 delineated using ZEN software (Zeiss) according to the mouse brain atlas<sup>32</sup>. For c-Fos and  
332 Kla immunofluorescence intensity analysis in individual cells, c-Fos-positive cells were  
333 circled, and the signal intensity for each antibody within the circled areas was recorded  
334 using Zen software (Zeiss). For Kla immunofluorescence intensity, to reduce potential  
335 artifacts across sections, the values were calculated from the mean signal intensity of the  
336 entire image by subtracting background signals using Zen software (Zeiss). Semi-  
337 quantification analyses were performed in the medial PFC (approximately from 2.1 to 2.4  
338 mm from the bregma), dorsal hippocampus, lateral habenula, and amygdala (approximately  
339 from -2.1 to -1.6 mm from the bregma), and ventral hippocampus (approximately from -3.5  
340 to -3.8 mm from the bregma).

341



342 **STED microscopy**

343 Brain slices were doubleimmunostained as described above. Mouse monoclonal anti-  
344 histone H1 antibody (sc-8030; Santa Cruz Biotechnology, Inc.) and rabbit polyclonal anti-Kla  
345 antibody were the primary antibodies, and Alexa Fluor 555- and Alexa Fluor 488 conjugated  
346 antibodies (Molecular Probes) were the secondary antibodies.

347 STED images were acquired with a TCS SP8 STED 3X system (Leica Microsystems,  
348 Wetzlar, Germany) with 2ch HyDSMD detectors<sup>33</sup>. A white laser (for excitation) and a 660-  
349 nm laser with a donut beam (for stimulated emission depletion) were used for STED imaging.  
350 For detection of histone H1 and Kla, we used excitation wavelengths of 561 and 488 nm,  
351 respectively. Raw STED images (pixel size: 20 nm) were recorded with a 93× glycerol  
352 immersion objective (Leica HC PL APO 93×/1.30 GLYC motC STED W) and deconvoluted  
353 using the Huygens software (SVI, Hilversum, Netherlands). The percentage of merged area  
354 in a nucleus stained for both histone H1 and Kla was estimated using the ImageJ program.

355

356 **Immunoprecipitation**

357 The PFCs were dissected, snap-frozen in liquid nitrogen, and stored at -80°C until further  
358 use. Fifty microliters of Dynabeads™ Protein G solution (10007D; Thermo Fisher Scientific)  
359 was separated into low-protein absorption tubes (PROKEEP; Watson Bio Lab, Tokyo, Japan)  
360 and reacted with 2 µg of rabbit polyclonal anti-lactyllysine antibody (PTM Biolabs) or normal  
361 rabbit IgG (Cell Signaling Technology, Inc., Danvers, MA, USA). The frozen tissues were then  
362 homogenized in lysis buffer (FNN0021, Thermo Fisher Scientific). Then, 200 µL of 1-µg/µL  
363 tissue lysate was added to the bead-antibody complex and incubated with a rotation of 30  
364 minutes at room temperature. The bead-antibody-antigen complex was then processed for  
365 mass spectrometry.

366

### 367 **Mass spectrometry**

368 *Trypsin digestion:* Bead-antibody-antigen complex was washed with 50 mM ammonium  
369 bicarbonate. The binding proteins were eluted by trypsin (Promega Corporation, Madison,  
370 WI, USA) for 1 hour at 37°C, reduced with 10 mM dithiothreitol for 30 minutes at room  
371 temperature, and alkylated with 20 mM iodoacetamide for 30 minutes at room

372 temperature, followed by an overnight incubation at 37°C. Digestion was stopped by adding  
373 trifluoroacetic acid. The digested sample was desalted using GL-Tip SDB (GL Sciences, Tokyo,  
374 Japan) and then dissolved in 20 µL of 0.1% trifluoroacetic acid.

375 *Liquid chromatograph-tandem mass spectrometer (LC-MS/MS) analysis:* The peptides were  
376 analyzed using LC-MS (EASY-nLC™ 1000, Orbitrap Fusion EDT; Thermo Fisher Scientific).  
377 Injected peptides were trapped on an Acclaim™ PepMap™ 100 C18 LC column (3 µm particle  
378 size, 0.075 mm inner diameter × 20 mm length; Thermo Fisher Scientific) and separated on  
379 an EASY-Spray LC column (3 µm particle size, 0.075 mm inner diameter × 150 mm length;  
380 Thermo Fisher Scientific) with a linear gradient of 0–35% acetonitrile with 0.1% formic acid  
381 over 60 minutes at a flow rate of 300 nL/minute. Data acquisition was performed using  
382 Xcalibur™ (Thermo Fisher Scientific). Full MS spectra (m/z 375–1500) were acquired at a  
383 resolution of 120,000. The most intense precursor ions were selected for collision-induced  
384 fragmentation in the linear ion trap at a normalized collision energy of 35%. Dynamic  
385 exclusion was employed within 60 seconds to prevent repetitive selection of peptides.

386 *Data analysis:* Raw data were analyzed using Proteome Discoverer™ (version 2.2, Thermo  
387 Fisher Scientific) with the Mascot search engine (version 2.6.1, Matrix Science Ltd., London,  
388 UK) against the Swiss-Prot database. The search parameters were as follows: mass  
389 tolerances in MS and MS/MS, 10 ppm and 0.6 Da; maximum missed cleavages allowed, 2.  
390 Methionine oxidation and N-acetylation were set as variable modifications, and cysteine  
391 carbamidomethylation was set as a fixed modification. A target-decoy database search was  
392 used to estimate the false-positive ratio for peptide identification; the false discovery rate  
393 was set at 1%.

394

### 395 **Western blot analysis**

396 Western blot analysis was performed as previously described, with some modifications<sup>30,31</sup>.  
397 Tissues from the brain and peripheral organs were collected from adult c57BL6/J mice,  
398 snap-frozen in liquid nitrogen, and stored at -80°C until further use. Peritoneal cavity cells  
399 were collected from adult C67BL/6J mice and used as a macrophage sample. Tissues and  
400 cultured cells were homogenized in lysis buffer (MCL1, Merck). Protein homogenates were

401 separated with gel electrophoresis using NuPAGE™ 4–12% Bis-Tris gels (Thermo Fisher  
402 Scientific) and transferred to polyvinylidene difluoride membranes. Membranes were  
403 preincubated in 5% skim milk in Tris-buffered saline with 0.05% Tween® 20 (TBST) for 1 hour  
404 and incubated for 2 hours in primary antibody, rabbit polyclonal anti-lactyllysine antibody  
405 (PTM Biolabs), or mouse monoclonal anti-β-actin antibody (A5316, Merck) diluted in TBST.  
406 They were then incubated for 1 hour with a secondary antibody conjugated with  
407 horseradish peroxidase (sc-2357, anti-rabbit IgG; sc-516102, anti-mouse IgG; Santa Cruz  
408 Biotechnology) diluted with TBST. All reactions were performed at room temperature.  
409 Immunoreactivity was visualized with a chemiluminescence detection reagent (ImmunoStar  
410 LD, 292-69903; FUJIFILM Wako Pure Chemical Corporation, Osaka, Japan) and  
411 photographed with a luminescent image analyzer (LAS-4000 mini; GE Healthcare,  
412 Buckinghamshire, UK).

413

414 **Electroconvulsive stimulation**

415 The experimental mice were briefly anesthetized with isoflurane, and bilateral  
416 electroconvulsive stimulation (ECS; current: 25 mA; shock duration: 1 s; frequency: 100  
417 pulses/sec; pulse width: 0.5 msec) was administered via ear clip electrodes with a pulse  
418 generator (ECT Unit; Ugo Basile, Gemonio, VA, Italy)<sup>34</sup>. Control mice were handled similarly,  
419 except that they were not administered ECS.

420

## 421 **Chronic SDS**

### 422 *Condition 1*

423 SDS serves as a preclinical model of chronic stress<sup>35,36</sup>. We performed chronic social defeat  
424 stress in mice at Fujita Health University, as previously described<sup>36</sup>.

425 *Screening of aggressor ICR mice:* Retired ICR breeders were screened for aggressive  
426 behavior for 3 consecutive days. They were individually housed in a clear rectangular  
427 hamster cage (26.7 cm [width] × 48.3 cm [depth] × 15.2 cm [height]; Allentown Caging  
428 Equipment, Allentown, NJ, USA) equipped with a clear perforated Plexiglass divider (0.6 cm

429 [width] × 45.7 cm [depth] × 15.2 cm [height]; Chubu Kagaku Shizai [custom order]) and a  
430 steel-wire top (Allentown Caging Equipment).

431 *Chronic SDS*: Experimental C57BL/6J mice were placed in the compartment containing an  
432 aggressor ICR mouse and were exposed to social defeat for 10 minutes. During this period,  
433 the experimental mice generally displayed submissive behaviors. They were then  
434 transferred to the other compartment of the aggressor's cage, allowing sensory interaction  
435 with the intruder C57BL/6J mouse and resident ICR aggressor mouse for approximately 24  
436 hours (cohabitation housing condition). This procedure was repeated for 10 consecutive  
437 days, with each experimental C57BL/6J mouse being exposed to a novel ICR aggressor each  
438 day to prevent habituation. Control C57BL/6J mice were placed in pairs in an identical home  
439 cage separated by a perforated divider. The control animals were rotated to a new cage  
440 compartment daily and allowed to interact with a novel mouse of the same strain. Following  
441 the last defeat session, all C57BL/6J mice were singly housed in standard mouse cages.  
442 Twenty-four hours after the last defeat session, a social avoidance test and other behavioral

443 tests were conducted as described. Brain sampling was performed 8 days after the last  
444 defeat session. *Condition 1* was used for OX-treatment experiments.

445

446 *Condition 2*

447 The experiment was performed at Fujita Health University, as described in *Condition 1*,  
448 except that the intruder C57BL/6J mice were individually housed in separate cages, away  
449 from ICR aggressor mice, after the 10-minute-aggression (separation housing condition). As  
450 in *Condition 1*, brain sampling was performed 8 days after the last defeat session.

451

452 *Condition 3*

453 The experiment was performed at Ibaraki University, as previously described<sup>37</sup>. The intruder  
454 C57BL/6J mice were exposed to sensory interaction with a resident ICR aggressor mouse in  
455 the other compartment of the aggressor's cage for approximately 24 hours (cohabitation



456 housing condition). Twenty-four hours after the last defeat session, a social avoidance test  
457 was conducted<sup>37</sup>. Brain sampling was performed 2 days after the last defeat session.

458

#### 459 **Drug treatment**

460 Twenty minutes prior to each defeat session, the mice were intraperitoneally administered  
461 sodium oxamate (OX; 1 g/kg; O2751, Sigma-Aldrich, Tokyo, Japan) or sodium L-lactate (1  
462 g/kg; L-7022, Sigma-Aldrich). They were administered the same amount of saline as the  
463 control. OX is an inhibitor of lactate dehydrogenase (LDH) activity in the central nervous  
464 system<sup>13,14</sup>. The dose of OX that we used was previously shown to be effective in  
465 suppressing seizures in a mouse model of epilepsy<sup>14</sup>. The dose of sodium L-lactate that we  
466 used was previously shown to exert antidepressant-like effects in a corticosterone-induced  
467 chronic stress model in mice<sup>7</sup>.

468

#### 469 **Behavioral tests**

470 Most of the behavioral tests were performed as described elsewhere<sup>38–41</sup>, unless otherwise  
471 noted.

472

473 *Social interaction test*: Social interaction was tested 1 day after the last defeat session as  
474 previously described<sup>36</sup>, with minor modifications. We used an open field chamber (40 cm  
475 (width) × 40 cm (depth) × 30 cm (height); O'HARA & Co., Tokyo, Japan) and a wire mesh  
476 cage (10.5 cm (width) × 6.5 cm (depth) × 29 cm (height); O'HARA & Co.) to enclose the ICR  
477 aggressor mouse. The ICR aggressor mouse that is novel to the defeated C57BL/6J mouse  
478 was used. Each social interaction test was composed of two 150-second phases: the ICR  
479 aggressor mouse is absent and present in the interaction zone for the first and second phase,  
480 respectively. An identical, empty wire mesh cage was placed for the first phase testing. A  
481 13.7 cm × 23.6 cm rectangular zone including the wire mesh cage was defined as the social  
482 interaction zone. Mouse behaviors were video-monitored, and the trajectory of mouse  
483 ambulation, distance traveled, and time spent in the interaction zone for all test phases  
484 were automatically determined using ImageSI (see "Image analysis"). A social interaction

485 ratio was calculated by dividing the time spent in the interaction zone when the target was  
486 present by the time spent in the interaction zone when the target was absent. A social  
487 interaction ratio of 1 was considered the threshold for dividing defeated mice into the  
488 susceptible and resilient groups.

489

490 *Light/dark transition test:* A light/dark transition test was conducted as previously  
491 described<sup>38–42</sup>. The apparatus consisted of a cage (42 cm (width) × 21 cm (depth) × 25 cm  
492 (height)) divided into two sections of equal size by a partition with a door (O’HARA & Co.).  
493 One chamber was brightly illuminated (390 lux), whereas the other chamber was dark (2  
494 lux). Mice were placed into the dark chamber and allowed to move freely between the two  
495 chambers with the door open for 10 minutes. The total number of transitions, latency to  
496 first enter the lit chamber, distance traveled, and time spent in each chamber were  
497 recorded using ImageLD (see “Image analysis”).

498

499 *Open field test*: The apparatus was a transparent square cage (42 cm (width) × 42 cm (depth)  
500 × 30 cm (height)) equipped with infrared photobeam sensors (VersaMax; Accuscan  
501 Instruments, Columbus, OH, USA) with a white floor<sup>38–41</sup>. The center of the floor was  
502 illuminated at 100 lux. Each mouse was placed in the corner of the cage. The total distance  
503 traveled (cm), vertical activity (rearing measured by counting the number of photobeam  
504 interruptions), time spent in the center area (20 cm × 20 cm), and stereotypic counts  
505 (defined by the number of breaks of the same beam) were recorded for 30 minutes using  
506 the VersaMax system.

507

508 *Porsolt forced-swim test*: A Plexiglas cylinder (20 cm height × 11.4 cm diameter; O'HARA &  
509 Co.) filled with water (21–23 °C) up to a height of 8 cm was placed in a white plastic chamber  
510 (32 cm (width) × 44 cm (depth) × 49 cm (height); O'HARA & Co.)<sup>38–41</sup>. Mice were placed into  
511 the cylinder, and both immobility and distance traveled were recorded over a 10-minute  
512 test period. The test was conducted for 2 consecutive two days, and the results of the first  
513 trial are shown. Images were captured at two frames per second. For each pair of successive

514 frames, the amount of area (pixels) in which the mouse moved was measured. When the  
515 amount of area was below a certain threshold, mouse behavior was classified as “immobile.”  
516 When the amount of area equaled or exceeded the threshold, the mouse was classified as  
517 “moving”. The optimal threshold to judge movement was determined by adjusting it to the  
518 amount of immobility measured by human observation. Immobility lasting for less than 2  
519 seconds was not included in the analysis. Data acquisition and analysis were performed  
520 automatically, using ImagePS/TS (see “Image analysis”).

521

522 *Tail suspension test*: Each mouse was suspended 30 cm above the floor by the tail in a white  
523 plastic chamber (41cm (width) × 31 cm (depth) × 41 cm (height); O’Hara & Co.)<sup>38–41</sup>. The  
524 behavior was recorded for 10 minutes. Images were captured through a video camera, and  
525 immobility was measured. Similar to the Porsolt forced swim test mentioned above,  
526 immobility was judged using ImagePS/TS (see “Image analysis”) according to a certain  
527 threshold. Immobility lasting <2 seconds was not included in the analysis.

528

529 *Sucrose preference test*: C57BL/6J mice were subjected to a two-bottle choice test, in which  
530 mice were provided with a bottle containing water and a second bottle containing 1%  
531 sucrose solution, with the left/right positions of the bottles counterbalanced across groups  
532 <sup>39,40</sup>. The mice were habituated to a two-bottle condition during all the experimental period.  
533 Sucrose preference during 4-hour in the test day was calculated as the percentage of  
534 sucrose preference =  $100 \times \{[\text{sucrose intake (g)}]/(\text{sucrose intake (g)} + \text{water intake (g)})\}$ .

535

536 *Locomotor activity monitoring in the home cage*: Locomotor activity monitoring in the home  
537 cage was performed as previously described<sup>30,41</sup>. A system that automatically analyzes the  
538 locomotor activity of mice in their home cage was used<sup>43</sup>. The system contains a home cage  
539 (29 cm (width) × 18 cm (depth) × 12 cm (height)) and filtered cage top, separated by a 13-  
540 cm-high metal stand containing an infrared video camera, attached to the top of the stand.  
541 Each mouse was individually housed in each home cage, and their locomotor activity was  
542 monitored for 6 days. Mice were allowed to habituate to the test apparatus, and hence, the

543 data of the latter 3 days were analyzed. Distance traveled was measured automatically  
544 using ImageHA (see “Image analysis”).

545

546 *Image analysis*: For the social interaction test, light/dark transition test, Porsolt forced swim  
547 test, and tail suspension test, image analysis programs (ImageSI/LD/PS/TS/HA) were used  
548 to automatically analyze mouse behaviors. The application programs, based on the public  
549 domain ImageJ program (developed by Wayne Rasband at the National Institute of Mental  
550 Health, Bethesda), were developed and modified for each test by Tsuyoshi Miyakawa.  
551 ImageLD program can be freely downloaded from the website of the “Mouse Phenotype  
552 Database” (<http://www.mouse-phenotype.org/>)<sup>44</sup>.

553

#### 554 **Measurements of brain lactate levels and pH**

555 In the *in vivo* experiments, the whole brain was used to measure tissue pH and lactate levels  
556 as previously described<sup>3</sup>. Briefly, snap-frozen tissues were homogenized in ice-cold distilled

557 H<sub>2</sub>O (5 mL per 500 mg of tissue). The pH of the homogenates was measured using a pH  
558 meter (LAQUA F-72, HORIBA, Ltd., Kyoto, Japan) equipped with a Micro ToupH electrode  
559 (9618S-10D, HORIBA, Ltd.) after a three-point calibration at pH 4.0, 7.0, and 9.0. Following,  
560 the concentration of lactate in the homogenates was determined using a multi-assay  
561 analyzer (GM7 Micro-Stat; Analox Instruments Ltd., London, UK) after calibration with an  
562 8.0-M standard lactate solution (GMRD-103, Analox Instruments). A 20- $\mu$ L aliquot of  
563 centrifuged supernatant was used for the measurement. In the *in vitro* experiments, lactate  
564 concentrations of the cultured cells and culture supernatant were measured using the  
565 lactate colorimetric assay kit II (K627-100; BioVision, Milpitas, CA, USA). Light transmittance  
566 was measured at a wavelength of 450 nm using a spectrophotometer (DU730; Beckman  
567 Coulter, Tokyo, Japan).

568

### 569 **Statistical analysis**

570 The data were analyzed by Student's t-test, one-way analysis of variance (ANOVA), two-way  
571 ANOVA, followed by Tukey's honestly significant difference post-hoc test, or linear



572 regression analysis using R version 3.5.2 or SAS Studio software version 9.4 (SAS Institute  
573 Inc., Cary, NC, USA).

574

#### 575 **Data availability**

576 The original blot images are provided in Extended data figures. The full statistical results are  
577 provided in Extended data tables.

578

#### 579 **References**

- 580 1. Zhang, D. *et al.* Metabolic regulation of gene expression by histone lactylation.  
581 *Nature* **574**, 575–580 (2019).
- 582 2. Magistretti, P. J. & Allaman, I. Lactate in the brain: from metabolic end-product  
583 to signalling molecule. *Nat. Rev. Neurosci.* **19**, 235–249 (2018).
- 584 3. Hagihara, H. *et al.* Decreased brain pH as a shared endophenotype of psychiatric  
585 disorders. *Neuropsychopharmacology* **43**, 459–468 (2018).
- 586 4. Hagihara, H. *et al.* Systematic analysis of brain lactate and pH levels in 65 animal  
587 models related to neuropsychiatric conditions. *bioRxiv* 2021.02.02.428362 (2021).
- 588 5. Irizarry-Caro, R. A. *et al.* TLR signaling adapter BCAP regulates inflammatory to  
589 reparatory macrophage transition by promoting histone lactylation. *Proc. Natl. Acad. Sci.*  
590 **117**, 30628–30638 (2020).

- 591 6. Cui, H. *et al.* Lung myofibroblasts promote macrophage profibrotic activity  
592 through lactate-induced histone lactylation. *Am. J. Respir. Cell Mol. Biol.* **64**, 115–125  
593 (2020).
- 594 7. Carrard, A. *et al.* Peripheral administration of lactate produces antidepressant-  
595 like effects. *Mol. Psychiatry* (2016) doi:10.1038/mp.2016.179.
- 596 8. Busnello, J. V. *et al.* Acute and chronic electroconvulsive shock in rats: Effects on  
597 peripheral markers of neuronal injury and glial activity. *Life Sci.* **78**, 3013–3017 (2006).
- 598 9. Díaz-García, C. M. *et al.* Neuronal stimulation triggers neuronal glycolysis and  
599 not lactate uptake. *Cell Metab.* **26**, 361–374.e4 (2017).
- 600 10. Lazeyras, F. *et al.* MRI, 1H-MRS, and functional MRI during and after prolonged  
601 nonconvulsive seizure activity. *Neurology* **55**, 1677–1682 (2000).
- 602 11. Najm, I. M. *et al.* Temporal changes in proton MRS metabolites after kainic acid-  
603 induced seizures in rat brain. *Epilepsia* **38**, 87–94 (1997).
- 604 12. Oses, J. P. *et al.* Sustained elevation of cerebrospinal fluid glucose and lactate  
605 after a single seizure does not parallel with mitochondria energy production. *Epilepsy Res.*  
606 **152**, 35–41 (2019).
- 607 13. Lam, T. K. T., Gutierrez-Juarez, R., Pocai, A. & Rossetti, L. Regulation of blood  
608 glucose by hypothalamic pyruvate metabolism. *Science* **309**, 943–947 (2005).
- 609 14. Sada, N., Lee, S., Katsu, T., Otsuki, T. & Inoue, T. Targeting LDH enzymes with a  
610 stiripentol analog to treat epilepsy. *Science* **347**, 1362–1367 (2015).
- 611 15. Bullitt, E. Expression of C-fos-like protein as a marker for neuronal activity  
612 following noxious stimulation in the rat. *J. Comp. Neurol.* **296**, 517–530 (1990).
- 613 16. Bullitt, E., Lee, C. L., Light, A. R. & Willcockson, H. The effect of stimulus duration  
614 on noxious-stimulus induced c-fos expression in the rodent spinal cord. *Brain Res.* **580**,  
615 172–179 (1992).
- 616 17. Kollack-Walker, Don, Watson, & Akil. Differential Expression of c- fos mRNA  
617 Within Neurocircuits of Male Hamsters Exposed to Acute or Chronic Defeat. *J.*  
618 *Neuroendocrinol.* **11**, 547–559 (1999).
- 619 18. Martinez, M., Calvo-Torrent, A. & Herbert, J. Mapping brain response to social  
620 stress in rodents with c-fos expression: A review. *Stress* **5**, 3–13 (2002).

- 621 19. Matsuda, S. *et al.* Persistent c-fos expression in the brains of mice with chronic  
622 social stress. *Neurosci. Res.* **26**, 157–170 (1996).
- 623 20. Ma, M. *et al.* Adjunctive treatment of brexpiprazole with fluoxetine shows a  
624 rapid antidepressant effect in social defeat stress model: Role of BDNF-TrkB signaling. *Sci.*  
625 *Rep.* **6**, 1–12 (2016).
- 626 21. Yang, B. *et al.* Comparison of R-ketamine and rapastinel antidepressant effects  
627 in the social defeat stress model of depression. *Psychopharmacology (Berl.)* **233**, 3647–  
628 3657 (2016).
- 629 22. Huang, D. W., Sherman, B. T. & Lempicki, R. A. Systematic and integrative  
630 analysis of large gene lists using DAVID bioinformatics resources. *Nat. Protoc.* **4**, 44–57  
631 (2009).
- 632 23. Huang, D. W., Sherman, B. T. & Lempicki, R. A. Bioinformatics enrichment tools:  
633 paths toward the comprehensive functional analysis of large gene lists. *Nucleic Acids Res.*  
634 **37**, 1–13 (2009).
- 635 24. Martinez, M., Phillips, P. J. & Herbert, J. Adaptation in patterns of c-fos  
636 expression in the brain associated with exposure to either single or repeated social stress  
637 in male rats. *Eur. J. Neurosci.* **10**, 20–33 (1998).
- 638 25. Gaffney, D. O. *et al.* Non-enzymatic lysine lactoylation of glycolytic enzymes. *Cell*  
639 *Chem. Biol.* **27**, 206–213.e6 (2020).
- 640 26. Andrés, M., García-Gomis, D., Ponte, I., Suau, P. & Roque, A. Histone H1 post-  
641 translational modifications: update and future perspectives. *Int. J. Mol. Sci.* **21**, 5941  
642 (2020).
- 643 27. Wisniewski, J. R., Zougman, A., Krüger, S. & Mann, M. Mass spectrometric  
644 mapping of linker histone H1 variants reveals multiple acetylations, methylations, and  
645 phosphorylation as well as differences between cell culture and tissue. *Mol. Cell.*  
646 *Proteomics MCP* **6**, 72–87 (2007).
- 647 28. Kamieniarz, K. *et al.* A dual role of linker histone H1.4 Lys 34 acetylation in  
648 transcriptional activation. *Genes Dev.* **26**, 797–802 (2012).
- 649 29. Anti-L-lactyllysine rabbit pAb. *PTM BIO*  
650 <https://www.ptmbiolabs.com/product/anti-lactyllysine-rabbit-pab/> (2019).

- 651 30. Hagihara, H. *et al.* Circadian gene circuitry predicts hyperactive behavior in a  
652 mood disorder mouse model. *Cell Rep.* **14**, 2784–2796 (2016).
- 653 31. Hagihara, H., Ohira, K., Toyama, K. & Miyakawa, T. Expression of the AMPA  
654 receptor subunits GluR1 and GluR2 is associated with granule cell maturation in the  
655 dentate gyrus. *Front. Neurosci.* **5**, (2011).
- 656 32. Franklin, K. B. J. & Paxinos, G. *The Mouse Brain in Stereotaxic Coordinates*.  
657 (Academic Press Inc.. San Diego., 1997).
- 658 33. Tanaka, M. *et al.* Fascin in lamellipodia contributes to cell elasticity by  
659 controlling the orientation of filamentous actin. *Genes Cells* **24**, 202–213 (2019).
- 660 34. Imoto, Y., Segi-Nishida, E., Suzuki, H. & Kobayashi, K. Rapid and stable changes in  
661 maturation-related phenotypes of the adult hippocampal neurons by electroconvulsive  
662 treatment. *Mol. Brain* **10**, 8 (2017).
- 663 35. Krishnan, V., Berton, O. & Nestler, E. The use of animal models in psychiatric  
664 research and treatment. *Am. J. Psychiatry* **165**, 1109 (2008).
- 665 36. Golden, S. A., Covington, H. E., Berton, O. & Russo, S. J. A standardized protocol  
666 for repeated social defeat stress in mice. *Nat. Protoc.* **6**, 1183–1191 (2011).
- 667 37. Goto, T. *et al.* Subchronic and mild social defeat stress accelerates food intake  
668 and body weight gain with polydipsia-like features in mice. *Behav. Brain Res.* **270**, 339–348  
669 (2014).
- 670 38. Shoji, H. & Miyakawa, T. Age-related behavioral changes from young to old age  
671 in male mice of a C57BL/6J strain maintained under a genetic stability program.  
672 *Neuropsychopharmacol. Rep.* **39**, 100–118 (2019).
- 673 39. Shoji, H. & Miyakawa, T. Increased depression-related behavior during the  
674 postpartum period in inbred BALB/c and C57BL/6 strains. *Mol. Brain* **12**, 70 (2019).
- 675 40. Shoji, H. & Miyakawa, T. Differential effects of stress exposure via two types of  
676 restraint apparatuses on behavior and plasma corticosterone level in inbred male  
677 BALB/cAJcl mice. *Neuropsychopharmacol. Rep.* **40**, 73–84 (2020).
- 678 41. Nakajima, R. *et al.* Comprehensive behavioral analysis of heterozygous Syngap1  
679 knockout mice. *Neuropsychopharmacol. Rep.* **39**, 223–237 (2019).

680 42. Takao, K. & Miyakawa, T. Light/dark transition test for mice. *J. Vis. Exp. JoVE* 104  
681 (2006) doi:10.3791/104.

682 43. Miyakawa, T. *et al.* Conditional calcineurin knockout mice exhibit multiple  
683 abnormal behaviors related to schizophrenia. *Proc. Natl. Acad. Sci. U. S. A.* **100**, 8987–  
684 8992 (2003).

685 44. Hattori, S., Okumura, Y., Takao, K., Yamaguchi, Y. & Miyakawa, T. Open source  
686 code for behavior analysis in rodents. *Neuropsychopharmacol. Rep.* **39**, 67–69 (2019).

687

## 688 **Acknowledgements**

689 We thank Giovanni Sala for invaluable comments on statistics. We also thank Tamaki

690 Murakami, Chikako Ozeki, Wakako Hasegawa, Yumiko Mobayashi, Yoko Kagami, Harumi

691 Mitsuya, Yoshihiro Takamiya, Satoko Hattori and Miho Tanaka for their technical assistance.

692 This work was supported by MEXT KAKENHI Grant Number JP16H06462, JP17H06417, and

693 JP17H06413, MEXT Promotion of Distinctive Joint Research Center Program Grant Number

694 JPMXP0618217663, JSPS KAKENHI Grant Number JP20H00522, JP18K07378, JP19K06502,

695 and JP16H06276 (AdAMS), and AMED Strategic Research Program for Brain Sciences Grant

696 Number JP18dm0107101.

697

## 698 **Author information**

699 **Contributions.** H.H. and T.M. designed experiments. H.H. wrote the manuscript. K.N., K.K.,  
700 and T.M. helped draft the manuscript. H.H., H.S., H.O., and A.T. performed the behavioral  
701 tests and analyzed the data. K. K. and M. N. performed STED microscopy analysis. T.M.  
702 supervised all aspects of the present study. All authors have approved the final manuscript.

703 **Corresponding authors.** Correspondence to Tsuyoshi Miyakawa.

704

705 **Ethics declarations**

706 The authors declare no competing interests.

707 **Figure legends**

708 **Figure 1. Protein lactylation induced by exogenous lactate in brain cells.** (a) Western blot  
709 images of lactylated lysine (Kla) in mouse tissues/cells (hippocampus (HIP), cerebral cortex  
710 (CX), and resident macrophages (MP). Entire membrane images are provided in the  
711 Extended Data Fig. 1. (b) Double immunostaining for Kla and the neuronal marker  $\beta$ III-  
712 tubulin in primary cultured cortical neurons (10 days in vitro, DIV). Scale bar: 20  $\mu$ m. (c, d)  
713 Kla levels in primary cultured cortical neurons (10 DIV) examined 30 minutes after  
714 treatment with lactate (25 mM, +) and/or 4-CIN (0.01 mM, +; 1 mM, ++) using  
715 immunocytochemistry. Arrow in (c) indicates the sampling time point. At least 200 cells  
716 were examined for each condition. Statistical results are provided in Extended Data Table  
717 4. (e) Glial fibrillary acidic protein (GFAP) and Kla double immunostaining at 10 DIV in culture.  
718 Open arrows indicate GFAP-positive astrocyte-like cells. Solid arrows indicate GFAP-  
719 negative neuronal cells. Scale bar: 50  $\mu$ m. (f–h) Mice were intraperitoneally injected with 1  
720 g/kg lactate or saline, once daily for 21 days. (g) Kla immunostaining images of the  
721 prefrontal cortices (PFCs) of control and lactate-treated mice. Scale bar: 100  $\mu$ m. (h) Bar

722 graph showing Kla immunoreactivity levels of the PFC of control and lactate-treated mice  
723 (P = 0.022, n = 7, 6). (i) Mouse PFC: Double immunostaining images of Kla and the  
724 glutamatergic neuron marker Camk2a (upper left panel), the GABAergic neuron marker  
725 GAD67 (upper right panel), the astrocyte marker S100b (lower left panel), and the microglial  
726 marker CD68 (lower right panel). Scale bar: 25  $\mu$ m.

727

728 **Figure 2. Neuronal excitation stimulates protein lactylation in neurons.** (a–c) Primary  
729 cultured cortical neurons (10 DIV) were treated with potassium chloride (KCl), with or  
730 without sodium oxamate (OX). Arrows indicate sampling time points (a). Cultured neurons  
731 were treated with KCl (100 mM) and lactate concentrations were measured in the culture  
732 supernatant (upper panel, b) and cell lysate (lower panel, b). \*P < 0.05, one-way analysis of  
733 variance (ANOVA) followed by post-hoc pairwise comparisons. N = 5 for each condition.  
734 Statistical results are provided in the Extended Data Table 5. (c) Results of Kla  
735 immunostaining analysis of cultured neurons expressing  $\beta$ III-tubulin treated with KCl [10  
736 mM (+) or 100 mM (++)] and OX [20 mM (+)] (c) At least 300 cells were examined for each



737 condition. **\*\*P** < 0.01; **##P** < 0.01 compared to the KCl/OX condition; one-way ANOVA  
738 followed by post-hoc pairwise comparisons (Extended Data Table 6). (d, e) Brain lactate  
739 levels in mice treated with electroconvulsive stimulation (ECS) (N = 8 mice for each  
740 condition). **##P** < 0.01 compared to control; one-way ANOVA followed by post-hoc pairwise  
741 comparisons (Extended Data Table 7). (f–h) K<sub>la</sub> in the mouse brain treated with ECS. Adult  
742 mice were treated with ECS 30 minutes after treatment with OX,  $\alpha$ -cyano-4-  
743 hydroxycinnamate (4-CIN), or saline. Brain sampling was performed 1 hour after ECS  
744 treatment (arrow, f). Immunostaining images of K<sub>la</sub> in the prefrontal cortex (PFC). Scale bar:  
745 100  $\mu$ m (g). Graph showing K<sub>la</sub> immunoreactivity in the PFCs of the mice (h). **#P** < 0.05  
746 compared to ECS-/OX-/4-CIN-, **\$P** < 0.05 compared to ECS+/OX-/4-CIN-; one-way ANOVA  
747 followed by post-hoc pairwise comparisons. N = 6–7 mice for each condition (Extended Data  
748 Table 8). (i) K<sub>la</sub> and c-Fos double immunostaining images of the mouse PFC at 1 hour after  
749 an ECS. Open and solid arrowheads indicate cells with low and high levels of K<sub>la</sub> + c-Fos,  
750 respectively. Scale bar: 50  $\mu$ m. (j) Scatterplot showing a correlation between K<sub>la</sub> and c-Fos  
751 immunoreactivity in individual cells in the PFC (represented as Z-score transformed values).

752 Data from 543 cells from 15 mice in four different conditions (Extended Data Fig. 4) are  
753 integrated in the graph.

754

755 **Figure 3. Social stress induces protein lactylation in the brain.** (a–c) Mice were exposed to  
756 repeated social defeat stress, with or without sodium oxamate injections and then analyzed  
757 by a series of behavioral tests (a). Arrow in (a) indicates the sampling time point. FS: Porsolt  
758 forced swim test; LD: light-dark transition test; OF: open field test; OX: sodium oxamate; SA:  
759 social avoidance test; SDS: social defeat stress; SP: sucrose preference test; TS: tail  
760 suspension test. (b) Social avoidance test. (c) Brain lactate levels in the three groups of mice.  
761 N = 10–14 mice for each condition. Statistical results are provided in the Extended Data  
762 Table 9 and 10, respectively. (d) Correlation matrix showing correlation coefficients  
763 between behavioral measures and brain lactate levels in control and socially defeated mice.  
764 (e, f) Brain sampling for immunohistochemical analysis was performed using another set of  
765 mice exposed to SDS with or without OX injection. (e) HC: home cage locomotor activity  
766 monitoring test. (f) Immunostaining images of Kla and bar graph showing Kla

767 immunoreactivity in the prefrontal cortex (PFC). Scale bar: 100  $\mu\text{m}$ . \*\* $P < 0.01$ , one-way  
768 analysis of variance followed by post-hoc pairwise comparisons;  $N = 6$  mice for each  
769 condition (Extended Data Table 11). (g) Immunostaining images of c-Fos in the PFC. (h) Bar  
770 graphs showing c-Fos-positive cells in the PFC (Extended Data Table 12). Mice in the home  
771 cage group were sampled immediately after being removed from the home cage. Mice in  
772 the OF group were sampled after a 2-hour exposure to the open field. (i–k) Scatterplots  
773 showing correlations between Kla immunoreactivity and c-Fos expression in the PFC and (i)  
774 the social interaction ratio in the social avoidance test (j), and the distance traveled in the  
775 dark compartment in the light/dark transition test, in mice from the OF group.  $N = 6$  for  
776 each condition.

777

778 **Figure 4. Histone H1 lactylation in the brain is increased by social stress.** (a) Double  
779 immunostaining of Kla and histone H1 in the mouse PFC. Arrows indicate Kla-negative and  
780 histone H1-positive Hoechst-stained cells, and arrowheads indicate Kla-negative and  
781 histone H1-negative Hoechst-stained cells. Scale bar: 50  $\mu\text{m}$ . (b) Venn diagram showing the

782 overlap between Kla-positive and histone H1-positive cells in the mouse PFC. (c) Super-  
783 resolution images of Kla and histone H1 in the nuclei of neurons of socially defeated mice  
784 recorded with STED microscopy. Arrowheads indicate Kla- and histone H1-double-positive  
785 structures. Scale bars: 5  $\mu\text{m}$  (upper panels), 1  $\mu\text{m}$  (lower panels). (d) Bar graphs show the  
786 percentage of Kla and histone H1 merged area in the nucleus. N = 18 cells from 3 mice for  
787 each condition. \*P = 0.012, linear regression analysis.  
788

789 Figure 1

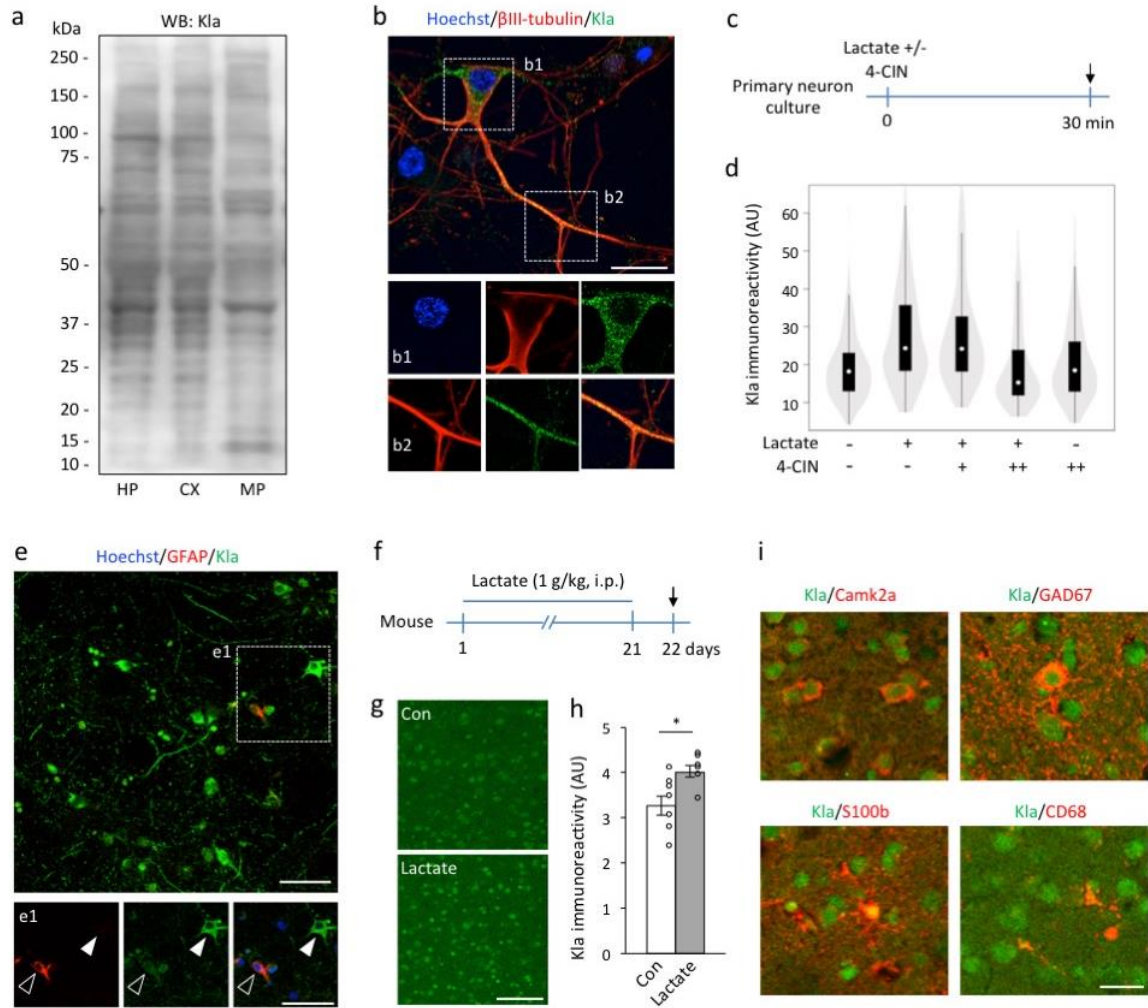

790

791

792 Figure 2

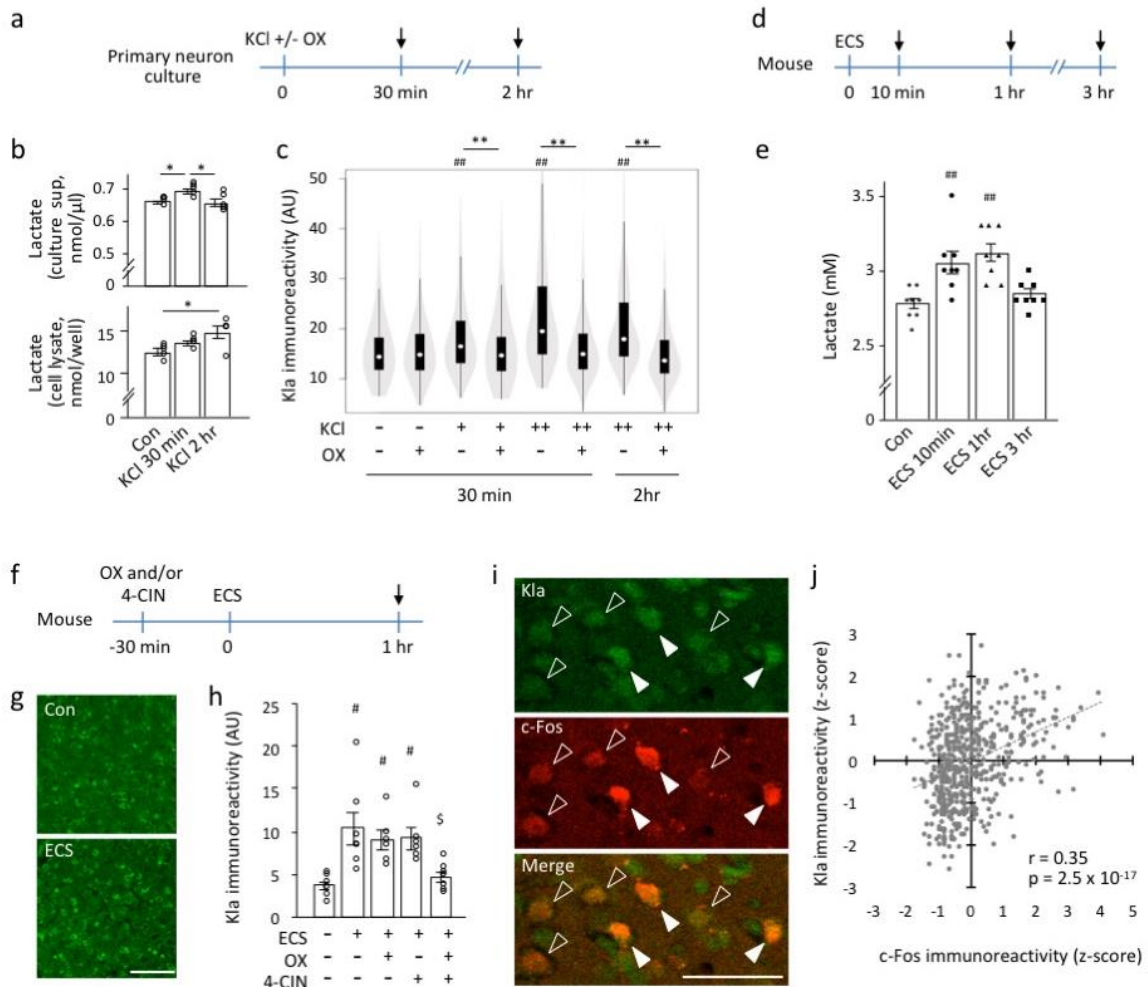

793

794

795 Figure 3

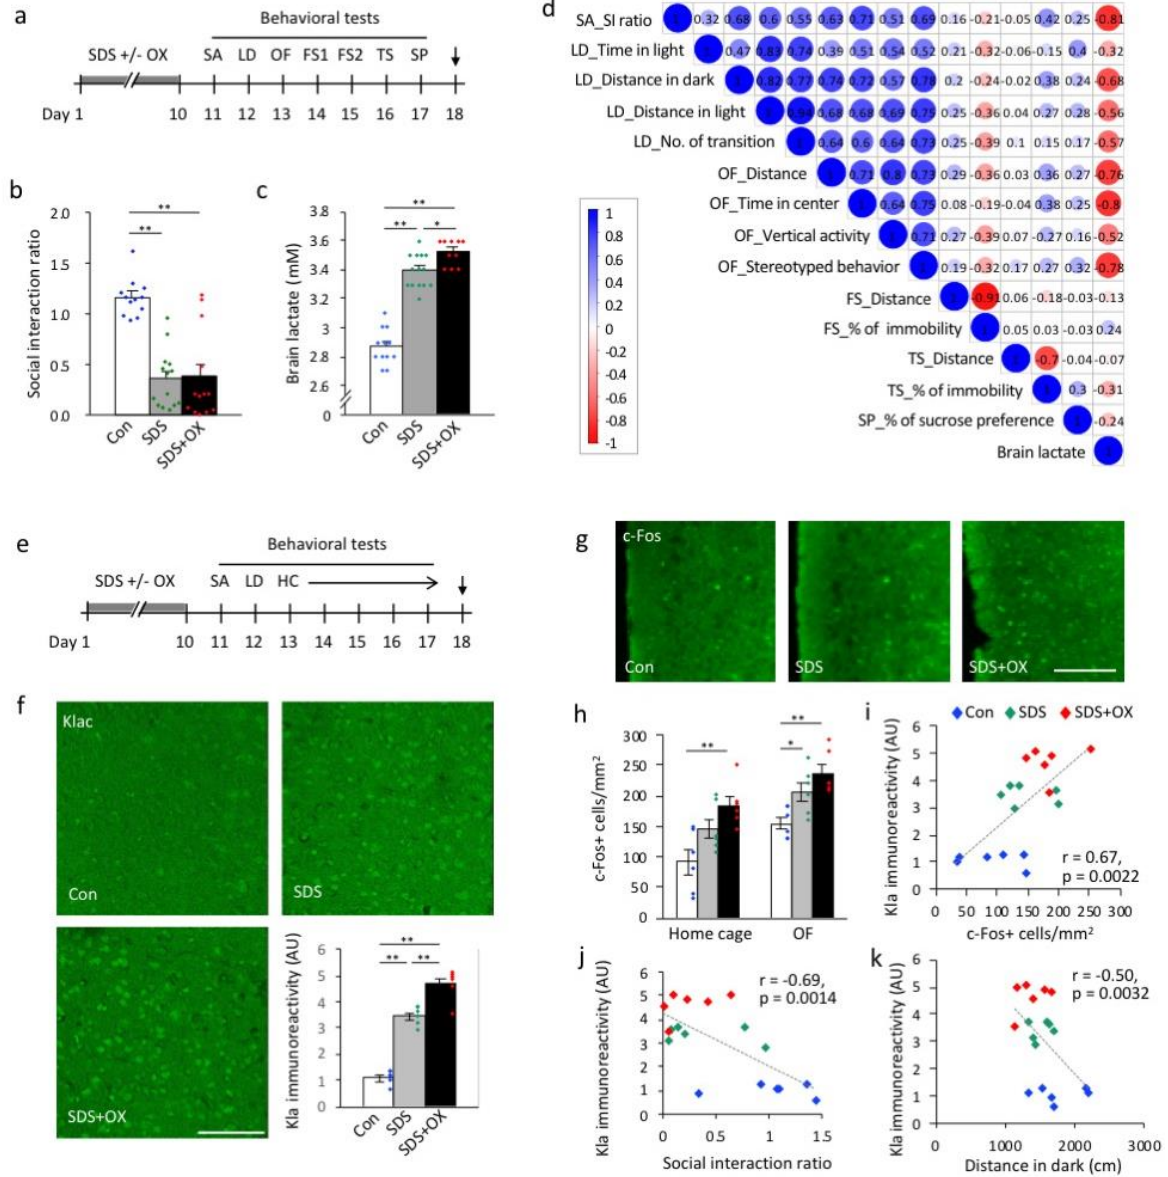

796

797

798 Figure 4

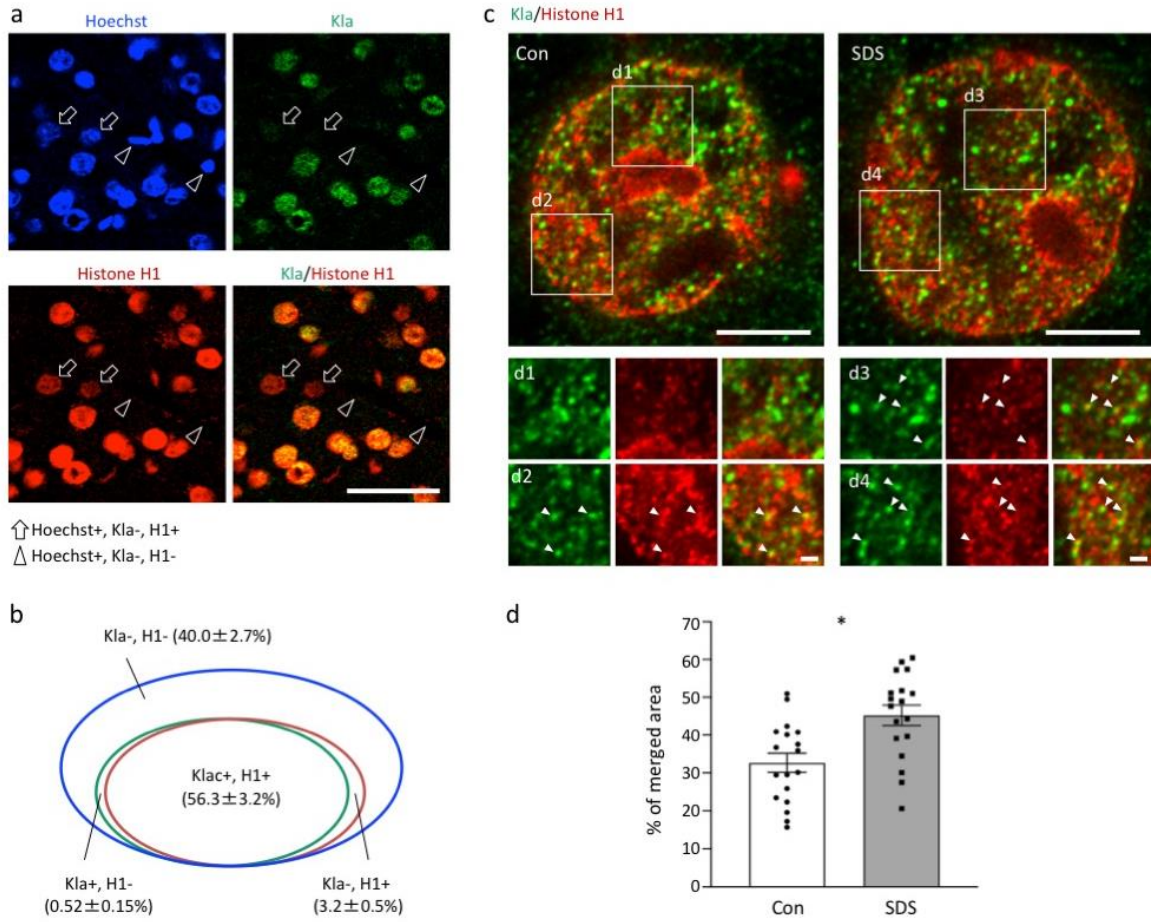

799

800
